# Supplementary material for: Association of Glutamine and Glutamate Metabolism with Mortality among Patients at Nutritional Risk—A Secondary Analysis of the Randomized Clinical Trial EFFORT
Source: MDPI journal article supplement (doi:10.3390/nu16020222), 2024-01-10
Supplement: s1 [file s1]

Supplemental Table S1: Baseline characteristics overall and stratified by high and low glutamate

|                                                | overall<br>(n=234) | low glutamate<br>(n=160) | high glutamate<br>(n=74) | p-value |
|------------------------------------------------|--------------------|--------------------------|--------------------------|---------|
| <b>Sociodemographic</b>                        |                    |                          |                          |         |
| Male sex                                       | 135 (57.7%)        | 94 (58.8%)               | 41 (55.4%)               | 0.63    |
| Mean age in years (SD)                         | 73.6 (13.3)        | 73.2 (12.6)              | 74.5 (14.9)              | 0.50    |
| <b>Nutritional assessment</b>                  |                    |                          |                          |         |
| Mean body-mass-index in kg/m <sup>2</sup> (SD) | 24 (5)             | 24 (5)                   | 25 (5)                   | 0.44    |
| Mean bodyweight in kg (SD)                     | 69 (15)            | 68 (15)                  | 70 (15)                  | 0.35    |
| Mean height in cm (SD)                         | 168.1 (8.6)        | 167.9 (8.0)              | 168.5 (9.7)              | 0.65    |
| <b>NRS 2002 total score</b>                    |                    |                          |                          | 0.46    |
| 3 points                                       | 60 (25.6%)         | 38 (23.8%)               | 22 (29.7%)               |         |
| 4 points                                       | 79 (33.8%)         | 53 (33.1%)               | 26 (35.1%)               |         |
| ≥ 5 points                                     | 95 (40.6%)         | 69 (43.1%)               | 26 (35.1%)               |         |
| CRP, day 1, mg/l                               | 84.1 (79.8)        | 86.9 (82.9)              | 78.1 (72.6)              | 0.44    |
| <b>Admission diagnosis n (%)</b>               |                    |                          |                          |         |
| Infectious disease                             | 63 (26.9%)         | 46 (28.7%)               | 17 (23.0%)               | 0.35    |
| Cancer disease                                 | 74 (31.6%)         | 52 (32.5%)               | 22 (29.7%)               | 0.67    |
| Cardiovascular disease                         | 24 (10.3%)         | 15 (9.4%)                | 9 (12.2%)                | 0.51    |
| Frailty                                        | 13 (5.6%)          | 8 (5.0%)                 | 5 (6.8%)                 | 0.59    |
| Lung disease                                   | 10 (4.3%)          | 7 (4.4%)                 | 3 (4.1%)                 | 0.91    |
| Gastrointestinal disease                       | 13 (5.6%)          | 8 (5.0%)                 | 5 (6.8%)                 | 0.59    |
| Renal disease                                  | 15 (6.4%)          | 10 (6.2%)                | 5 (6.8%)                 | 0.88    |
| <b>Comorbidities n (%)</b>                     |                    |                          |                          |         |
| Charlson Comorbidity Index                     | 6.4 (2.8)          | 6.4 (2.9)                | 6.2 (2.6)                | 0.69    |
| Hypertension                                   | 137 (58.5%)        | 89 (55.6%)               | 48 (64.9%)               | 0.18    |
| Malignant disease                              | 110 (47.0%)        | 80 (50.0%)               | 30 (40.5%)               | 0.18    |
| Chronic kidney disease                         | 81 (34.6%)         | 52 (32.5%)               | 29 (39.2%)               | 0.32    |
| Coronary heart disease                         | 54 (23.1%)         | 33 (20.6%)               | 21 (28.4%)               | 0.19    |
| Diabetes mellitus                              | 43 (18.4%)         | 29 (18.1%)               | 14 (18.9%)               | 0.88    |
| Congestive heart failure                       | 45 (19.2%)         | 28 (17.5%)               | 17 (23.0%)               | 0.32    |
| Chronic obstructive pulmonary disease          | 26 (11.1%)         | 16 (10.0%)               | 10 (13.5%)               | 0.43    |
| Peripheral arterial disease                    | 26 (11.1%)         | 15 (9.4%)                | 11 (14.9%)               | 0.21    |
| Stroke                                         | 27 (11.5%)         | 18 (11.2%)               | 9 (12.2%)                | 0.84    |
| Dementia                                       | 11 (4.7%)          | 7 (4.4%)                 | 4 (5.4%)                 | 0.73    |
| <b>Metabolites</b>                             |                    |                          |                          |         |
| Mean plasma glutamine concentration (μmol/l)   | 522.5 (196.2)      | 567.5 (180.1)            | 425.2 (195.5)            | <0.001  |
| Mean plasma glutamate concentration (μmol/l)   | 152.10 (110.35)    | 97.18 (32.72)            | 270.85 (125.02)          | <0.001  |

Table S2: Association of nutritional parameters with a decrease in plasma glutamate levels

| <b>Glutamate decrease of 10<br/>μmol/l</b> | <b>unadjusted</b>                | <b>adjusted*</b>                 |
|--------------------------------------------|----------------------------------|----------------------------------|
|                                            | Coef (95% CI)<br>p-value         | Coef (95% CI)<br>p-value         |
| <b>Nutritional assessment</b>              |                                  |                                  |
| Bodyweight in kg                           | -0.01 (-0.10 to 0.09) p= 0.879   | 0.00 (-0.10 to 0.10) p= 0.928    |
| Body-mass-index in kg/m <sup>2</sup>       | -0.03 (-0.32 to 0.26) p= 0.848   | -0.03 (-0.32 to 0.26) p= 0.846   |
| <b>NRS total score</b>                     |                                  |                                  |
| 3 points                                   | reference                        | reference                        |
| 4 points                                   | -0.53 (-4.23 to 3.16) p= 0.777   | -0.49 (-4.29 to 3.31) p= 0.800   |
| ≥ 5 points                                 | -3.75 (-7.30 to -0.19) p= 0.039  | -3.78 (-7.46 to -0.10) p= 0.044  |
| <b>CRP, day 1, mg/l</b>                    |                                  |                                  |
|                                            | 0.00 (-0.02 to 0.02) p= 0.820    | 0.00 (-0.04 to 0.03) p= 0.802    |
| <b>NRS score components</b>                |                                  |                                  |
| <b>Loss of appetite **</b>                 | -1.24 (-5.56 to 3.08) p= 0.572   | -1.27 (-5.73 to 3.20) p= 0.577   |
| <b>Weight loss</b>                         |                                  |                                  |
| < 5% in 3 months                           | reference                        | reference                        |
| > 5% in 3 months                           | -0.80 (-4.84 to 3.23) p= 0.695   | -0.74 (-4.84 to 3.36) p= 0.722   |
| > 5% in 2 months                           | 2.03 (-2.05 to 6.10) p= 0.328    | 2.03 (-2.09 to 6.15) p= 0.333    |
| > 5% in 1 month                            | 0.41 (-3.41 to 4.22) p= 0.834    | 0.37 (-3.51 to 4.24) p= 0.853    |
| <b>Reduced dietary intake</b>              |                                  |                                  |
| >75%                                       | reference                        | reference                        |
| 50-75%                                     | 3.69 (-1.57 to 8.94) p= 0.168    | 3.78 (-1.55 to 9.12) p= 0.164    |
| 25-50%                                     | 1.02 (-4.00 to 6.05) p= 0.688    | 1.10 (-4.04 to 6.24) p= 0.673    |
| <25%                                       | 0.05 (-5.49 to 5.59) p= 0.987    | 0.14 (-5.50 to 5.78) p= 0.961    |
| <b>Severity of disease</b>                 |                                  |                                  |
| 1                                          | reference                        | reference                        |
| 2                                          | -1.42 (-4.41 to 1.57) p= 0.351   | -1.52 (-4.69 to 1.66) p= 0.348   |
| 3                                          | -2.62 (-24.48 to 19.25) p= 0.814 | -3.60 (-26.08 to 18.87) p= 0.752 |

*Unadjusted and adjusted regression analysis to identify associations of glutamate concentration at admission with nutritional parameters. The regression coefficients (95% CI) indicate the change in glutamine concentration by ten units (10 μmol/l). For binary parameters, patients with the characteristics are compared to patients without the characteristic. BMI, body mass index; CI, Confidence Interval; Coef, Coefficient; NRS, Nutritional Risk Screening 2002; CRP, C-reactive protein; CI, confidence interval. \*Adjusted for CCI, CRP, sex and intervention. \*\* In the week preceding hospitalisation compared to usual appetite and intake.*

Table S3: Association of nutritional parameters with a decrease in plasma glutamate levels (without outliers)

|                                            | unadjusted                       | adjusted*                        |
|--------------------------------------------|----------------------------------|----------------------------------|
| Glutamate decrease of 10 $\mu\text{mol/l}$ | Coef (95% CI)<br>p-value         | Coef (95% CI)<br>p-value         |
| <b>Nutritional assessment</b>              |                                  |                                  |
| Bodyweight in kg                           | 0.02 (-0.06 to 0.09) p= 0.612    | 0.02 (-0.06 to 0.10) p= 0.677    |
| Body-mass-index in kg/m <sup>2</sup>       | 0.09 (-0.14 to 0.32) p= 0.430    | 0.08 (-0.15 to 0.31) p= 0.478    |
| <b>NRS 2002 score</b>                      |                                  |                                  |
| 3 points                                   | reference                        | reference                        |
| 4 points                                   | -0.04 (-2.96 to 2.88) p= 0.978   | 0.02 (-2.98 to 3.01) p= 0.992    |
| ≥ 5 points                                 | -1.94 (-4.74 to 0.86) p= 0.173   | -1.73 (-4.62 to 1.17) p= 0.241   |
| CRP, day 1, mg/l                           | 0.00 (-0.01 to 0.01) p= 0.917    | 0.00 (-0.03 to 0.03) p= 0.969    |
| <b>NRS score components</b>                |                                  |                                  |
| Loss of appetite **                        | 2.34 (-1.10 to 5.78) p= 0.182    | 2.55 (-1.01 to 6.11) p= 0.160    |
| <b>Weight loss</b>                         |                                  |                                  |
| < 5% in 3 months                           | reference                        | reference                        |
| > 5% in 3 months                           | -1.31 (-4.47 to 1.85) p= 0.415   | -1.29 (-4.49 to 1.90) p= 0.426   |
| > 5% in 2 months                           | -0.35 (-3.57 to 2.87) p= 0.830   | -0.30 (-3.55 to 2.94) p= 0.854   |
| > 5% in 1 month                            | 0.96 (-1.99 to 3.92) p= 0.522    | 0.85 (-2.15 to 3.85) p= 0.577    |
| <b>Reduced dietary intake</b>              |                                  |                                  |
| >75%                                       | reference                        | reference                        |
| 50-75%                                     | 1.44 (-2.68 to 5.56) p= 0.491    | 1.58 (-2.59 to 5.75) p= 0.457    |
| 25-50%                                     | 0.38 (-3.54 to 4.29) p= 0.850    | 0.44 (-3.55 to 4.44) p= 0.828    |
| <25%                                       | 0.05 (-4.27 to 4.36) p= 0.983    | 0.17 (-4.21 to 4.55) p= 0.940    |
| <b>Severity of disease</b>                 |                                  |                                  |
| 1                                          | reference                        | reference                        |
| 2                                          | -2.01 (-4.34 to 0.31) p= 0.090   | -2.37 (-4.82 to 0.09) p= 0.059   |
| 3                                          | -1.90 (-18.75 to 14.95) p= 0.824 | -3.88 (-21.13 to 13.36) p= 0.658 |

Unadjusted and adjusted regression analysis to identify associations of glutamate concentration at admission with nutritional parameters. The regression coefficients (95% CI) indicate the change in glutamine concentration by ten units (10  $\mu\text{mol/l}$ ). For binary parameters, patients with the characteristics are compared to patients without the characteristic. BMI, body mass index; NRS 2002, Nutritional Risk Screening 2002; CRP, C-reactive protein; CI, confidence interval. \*Adjusted for CCI, CRP, sex and intervention. \*\* In the week preceding hospitalisation compared to usual appetite and intake.

Supplemental Table S4: Association of nutritional parameters with a decrease in plasma glutamate levels (logarithmic calculation)

|                                            | unadjusted                      | adjusted*                       |
|--------------------------------------------|---------------------------------|---------------------------------|
| Glutamate decrease of 10 $\mu\text{mol/l}$ | Coef (95% CI)<br>p-value        | Coef (95% CI)<br>p-value        |
| <b>nutritional assessment</b>              |                                 |                                 |
| bodyweight in kg                           | 0 (0.00 to 0.01) p= 0.750       | 0.00 (0.00 to 0.01) p= 0.761    |
| body-mass-index in $\text{kg/m}^2$         | 0.00 (-0.01 to 0.02) p= 0.717   | 0.00 (-0.01 to 0.02) p= 0.745   |
| <b>NRS 2002 score</b>                      |                                 |                                 |
| 3 points                                   | reference                       | reference                       |
| 4 points                                   | -0.05 (-0.25 to 0.16) p= 0.653  | -0.05 (0.00 to 0.00) p= 0.955   |
| $\geq 5$ points                            | -0.21 (-0.40 to -0.01) p= 0.035 | -0.20 (-0.40 to -0.00) p= 0.047 |
| CRP, day 1, $\text{mg/l}$                  | 0.00 (0.00 to 0.00) p= 0.872    | 0.00 (0.00 to 0.00) p= 0.955    |
| <b>NRS score components</b>                |                                 |                                 |
| <b>loss of appetite **</b>                 | -0.02 (-0.25 to 0.22) p= 0.900  | -0.01 (-0.26 to 0.23) p= 0.921  |
| <b>bodyweight loss (kg)</b>                |                                 |                                 |
| < 5% in 3 months                           | reference                       | reference                       |
| > 5% in 3 months                           | -0.05 (-0.27 to 0.17) p= 0.659  | -0.05 (-0.27 to 0.17) p= 0.661  |
| > 5% in 2 months                           | 0.03 (-0.19 to 0.26) p= 0.774   | 0.04 (-0.19 to 0.26) p= 0.753   |
| > 5% in 1 month                            | 0.01 (-0.20 to 0.22) p= 0.905   | 0.00 (-0.21 to 0.22) p= 0.971   |
| <b>reduced dietary intake **</b>           |                                 |                                 |
| >75%                                       | reference                       | reference                       |
| 50-75%                                     | 0.13 (-0.16 to 0.42) p= 0.370   | 0.14 (-0.15 to 0.43) p= 0.355   |
| 25-50%                                     | 0.00 (-0.27 to 0.28) p= 0.976   | 0.00 (-0.28 to 0.29) p= 0.974   |
| <25%                                       | -0.14 (-0.32 to 0.28) p= 0.899  | -0.14 (-0.32 to 0.29) p= 0.928  |
| <b>severity of disease</b>                 |                                 |                                 |
| 1                                          | reference                       | reference                       |
| 2                                          | -0.13 (-0.29 to 0.03) p= 0.123  | -0.14 (-0.31 to 0.03) p= 0.111  |
| 3                                          | 0.00 (-1.19 to 1.18) p= 0.996   | -0.07 (-1.29 to 1.15) p= 0.915  |

Unadjusted and adjusted regression analysis to identify associations of glutamate concentration at admission with nutritional parameters. The regression coefficients (95% CI) indicate the change in glutamine concentration by ten units (10  $\mu\text{mol/l}$ ). For binary parameters, patients with the characteristics are compared to patients without the characteristic. BMI, body mass index; NRS 2002, Nutritional Risk Screening 2002; CRP, C-reactive protein; CI, confidence interval. \*Adjusted for CCI, CRP, sex and intervention. \*\* In the week preceding hospitalisation compared to usual appetite and intake.

Supplemental Table S5: Prognostic value of high vs. low levels of glutamine or glutamate on secondary clinical outcomes

|                                                | n. of event (%) | n. of event (%) | unadjusted                    | adjusted*                     |
|------------------------------------------------|-----------------|-----------------|-------------------------------|-------------------------------|
| Secondary clinical outcomes                    | high            | low             | HR (95% CI) p-value           | HR (95% CI) p-value           |
| <b>Adverse events, 30 days</b>                 |                 |                 |                               |                               |
| Glutamine                                      | 29/75 (39%)     | 62/159 (39%)    | 1.01 (0.58 to 1.78) p= 0.962  | 1.02 (0.56 to 1.85) p= 0.951  |
| Glutamate                                      | 18/74 (24%)     | 73/160(46%)     | 2.16 (1.41 to 4.83) p= 0.002  | 2.65 (1.39 to 5.05) p= 0.003  |
| <b>ICU, 30 days</b>                            |                 |                 |                               |                               |
| Glutamine                                      | 1/75 (1%)       | 3/159 (2%)      | 1.42 (0.15 to 13.91) p= 0.762 | 1.51 (0.15 to 15.48) p= 0.729 |
| Glutamate                                      | 0/74 (0%)       | 4/160 (3%)      | 1.00                          | 1.00                          |
| <b>Rehospitalisation 30 days</b>               |                 |                 |                               |                               |
| Glutamine                                      | 8/75 (11%)      | 10/159 (6%)     | 0.56 (0.21 to 1.49) p= 0.246  | 0.57 (0.21 to 1.52) p= 0.263  |
| Glutamate                                      | 3/74 (4%)       | 15/160 (9%)     | 2.45 (0.69 to 8.73) p= 0.168  | 2.41 (0.67 to 8.66) p= 0.177  |
| <b>Major complications</b>                     |                 |                 |                               |                               |
| Glutamine                                      | 8/75 (11%)      | 14/159 (9%)     | 0.81 (0.32 to 2.02) p= 0.649  | 0.80 (0.32 to 2.03) p= 0.641  |
| Glutamate                                      | 2/74 (3%)       | 20/160 (13%)    | 5.14 (1.17 to 22.62) p= 0.030 | 5.35 (1.21 to 23.67) p= 0.027 |
| <b>Decline in functional status of &gt;10%</b> |                 |                 |                               |                               |
| Glutamine                                      | 19/75 (25%)     | 45/159 (28%)    | 1.16 (0.62 to 2.17) p= 0.635  | 1.17 (0.60 to 2.30) p= 0.643  |
| Glutamate                                      | 14/75 (19%)     | 50/160 (31%)    | 1.95 (1.00 to 3.81) p= 0.051  | 1.95 (0.95 to 4.02) p= 0.069  |
| <b>Falls, 180 days</b>                         |                 |                 |                               |                               |
| Glutamine                                      | 5/75 (7%)       | 18/158 (11%)    | 1.80 (0.64 to 5.05) p= 0.264  | 1.69 (0.59 to 4.82) p= 0.327  |
| Glutamate                                      | 6/74 (8%)       | 17/159 (11%)    | 1.36 (0.51 to 3.60) p= 0.539  | 1.47 (0.54 to 3.99) p= 0.452  |

Cox regression models reporting adjusted hazard ratios according to levels stratified by cutoff values of glutamine (595.5  $\mu\text{mol/l}$ ) and glutamate (167.5  $\mu\text{mol/l}$ ). Low levels are defined as less or equal the cutoff value, high levels as greater the cutoff value. Abbreviations: HR, hazard ratio; CI, confidence interval; ICU, intensive care unit. \*Adjusted for CCI, CRP, NRS total score, sex and intervention.

Supplemental Table S6: Prognostic value of high vs. low levels of glutamine or glutamate on secondary clinical outcomes

|                                                           | mean (SD)     | mean (SD)     | unadjusted                         | adjusted*                          |
|-----------------------------------------------------------|---------------|---------------|------------------------------------|------------------------------------|
|                                                           | high          | low           | Coefficient (95% CI) p-value       | Coefficient (95% CI) p-value       |
| <b>Secondary nutritional outcomes</b>                     |               |               |                                    |                                    |
| <b>Mean caloric intake per day, kcal/kg/d<sup>a</sup></b> |               |               |                                    |                                    |
| Glutamine                                                 | 13.59 (10.74) | 15.13 (11.14) | 91.51 (-110.24 to 293.27) p= 0.372 | 89.91 (-108.64 to 288.64) p= 0.374 |
| Glutamate                                                 | 13.68 (11.34) | 15.08 (10.86) | 38.74 (-163.32 to 240.80) p= 0.706 | 49.53 (-148.87 to 247.93) p= 0.623 |
| <b>Mean protein intake per day, kcal/kg/d<sup>a</sup></b> |               |               |                                    |                                    |
| Glutamine                                                 | 0.57 (0.43)   | 0.63 (0.40)   | 3.81 (-4.05 to 11.67) p= 0.340     | 4.11 (-3.68 to 11.89) p= 0.299     |
| Glutamate                                                 | 0.59 (0.40)   | 0.61 (0.41)   | -1.36 (-9.40 to 6.69) p= 0.739     | -1.22 (-9.10 to 6.67) p=0.761      |
| <b>Secondary nutritional outcomes</b>                     |               |               |                                    |                                    |
| <b>Reaching caloric-intake goals <sup>b</sup></b>         |               |               |                                    |                                    |
| Glutamine                                                 | 41/73 (56%)   | 89/150 (59%)  | 1.14 (0.65 to 2.00) p= 0.653       | 1.05 (0.58 to 1.89) p= 0.879       |
| Glutamate                                                 | 45/72 (63%)   | 85/151 (56%)  | 0.77 (0.43 to 1.37) p= 0.380       | 0.83 (0.46 to 1.51) p= 0.537       |
| <b>Reaching protein-intake goals <sup>b</sup></b>         |               |               |                                    |                                    |
| Glutamine                                                 | 30/72 (42%)   | 75/146 (51%)  | 1.48 (0.84 to 2.61) p= 0.178       | 1.52 (0.84 to 2.75) p= 0.163       |
| Glutamate                                                 | 29/68 (43%)   | 76/150 (51%)  | 1.38 (0.78 to 2.46) p= 0.273       | 1.39 (0.77 to 2.52) p= 0.277       |

Cox regression models reporting adjusted hazard ratios according to levels stratified by cutoff values of glutamine (595.5  $\mu\text{mol/l}$ ) and glutamate (167.5  $\mu\text{mol/l}$ ). Low levels are defined as less or equal the cutoff value, high levels as greater the cutoff value. Abbreviations: HR, hazard ratio; CI, confidence interval. \*Adjusted for CCI, CRP, NRS total score, sex and intervention.

*a* = per kg of bodyweight until day 10 of hospitalisation

*b* = refer to achieve 75% of calculated targets

Supplemental Table S7: Prognostic value of high vs. low glutamate-to-glutamine-ratio on mortality

|                                       | <b>unadjusted</b> |                 | <b>adjusted *</b>            |
|---------------------------------------|-------------------|-----------------|------------------------------|
| <b>Short- and long-term mortality</b> | n. of event (%)   | n. of event (%) | HR (95% CI) p-value          |
| <b>30-day all-cause mortality</b>     | <b>high</b>       | <b>low</b>      |                              |
|                                       | 17/85 (20%)       | 40/149 (27%)    | 1.37 (0.78 to 2.42) p= 0.278 |
| <b>180-day all-cause mortality</b>    | <b>high</b>       | <b>low</b>      |                              |
|                                       | 33/85 (39%)       | 67/149 (45%)    | 1.24 (0.82 to 1.89) p= 0.308 |
| <b>1-year all-cause mortality</b>     | <b>high</b>       | <b>low</b>      |                              |
|                                       | 37/85 (44%)       | 77/149 (52%)    | 1.27 (0.86 to 1.88) p= 0.230 |
| <b>2-year all-cause mortality</b>     | <b>high</b>       | <b>low</b>      |                              |
|                                       | 42/85 (49%)       | 94/149 (63%)    | 1.40 (0.97 to 2.01) p= 0.070 |
| <b>3-year all-cause mortality</b>     | <b>high</b>       | <b>low</b>      |                              |
|                                       | 47/85 (55%)       | 93/149 (62%)    | 1.26 (0.88 to 1.78) p= 0.204 |
| <b>5-year all-cause mortality</b>     | <b>high</b>       | <b>low</b>      |                              |
|                                       | 54/85 (64%)       | 99/149 (66%)    | 1.22 (0.87 to 1.70) p= 0.248 |

*Cox regression models reporting adjusted hazard ratios according to levels stratified by empirical cutoff value of glutamine-to-glutamate ratio, which is 0.28. Low levels are defined as less or equal the cutoff value, high levels as greater the cutoff value. Abbreviations: HR, hazard ratio; CI, confidence interval. \*Adjusted for CCI, CRP, NRS total score, sex and intervention.*

Supplemental Table S8: Prognostic value of high vs. low glutamate-to-glutamine-ratio on secondary clinical outcomes

| Secondary clinical outcomes                    | n. of event (%) | n. of event (%) | unadjusted                    | adjusted                      |
|------------------------------------------------|-----------------|-----------------|-------------------------------|-------------------------------|
|                                                |                 |                 | OR (95% CI) p-value           | OR (95% CI) p-value           |
| <b>Adverse events, 30 days</b>                 | <b>high</b>     | <b>low</b>      |                               |                               |
|                                                | 28/85 (33%)     | 63/149 (42%)    | 1.49 (0.85 to 2.60) p= 0.160  | 1.34 (0.75 to 2.42) p= 0.3234 |
| <b>ICU, 30 days</b>                            | <b>high</b>     | <b>low</b>      |                               |                               |
|                                                | 0/85 (0%)       | 4/149 (3%)      | 1.00                          | 1.00                          |
| <b>Rehospitalisation 30 days</b>               | <b>high</b>     | <b>low</b>      |                               |                               |
|                                                | 3/85 (4%)       | 15/149 (10%)    | 3.06 (0.86 to 10.89) p= 0.084 | 2.99 (0.83 to 10.71) p= 0.093 |
| <b>Major complications</b>                     | <b>high</b>     | <b>low</b>      |                               |                               |
|                                                | 5/85 (6%)       | 17/149 (11%)    | 2.06 (0.73 to 5.80) p= 0.171  | 2.06 (0.72 to 5.84) p= 0.176  |
| <b>Decline in functional status of &gt;10%</b> | <b>high</b>     | <b>low</b>      |                               |                               |
|                                                | 20/85 (24%)     | 44/149 (30%)    | 1.36 (0.74 to 2.51) p= 0.323  | 1.19 (0.61 to 2.30) p= 0.616  |
| <b>Falls, 180 days</b>                         | <b>high</b>     | <b>low</b>      |                               |                               |
|                                                | 6/85 (7%)       | 17/148 (11%)    | 1.71 (0.65 to 4.51) p= 0.280  | 1.89 (0.70 to 5.10) p= 0.209  |

Cox regression models reporting adjusted hazard ratios according to levels stratified by empirical cutoff value of glutamine-to-glutamate ratio, which is 0.28. Low levels are defined as less or equal the cutoff value, high levels as greater the cutoff value. Abbreviations: OR, odds ratio; CI, confidence interval; ICU, intensive care unit. \*Adjusted for CCI, CRP, NRS total score, sex and intervention.



Supplemental Table S9: Prognostic value of high vs. low glutamate-to-glutamine-ratio on secondary clinical outcomes

| Secondary nutritional outcomes                             |                 |                 | unadjusted                          | adjusted                           |
|------------------------------------------------------------|-----------------|-----------------|-------------------------------------|------------------------------------|
|                                                            | mean (SD)       | mean (SD)       | Coefficient (95% CI) p-value        | Coefficient (95% CI) p-value       |
| <b>Mean caloric intake per day, kcal/kg/d <sup>a</sup></b> | <b>high</b>     | <b>low</b>      |                                     |                                    |
|                                                            | 14.28 (11.33)   | 14.83 (10.86)   | -23.72 (-220.10 to 172.65) p= 0.812 | -6.42 (-199.55 to 186.72) p= 0.948 |
| <b>Mean protein intake per day, kcal/kg/d <sup>a</sup></b> | <b>high</b>     | <b>low</b>      |                                     |                                    |
|                                                            | 0.62 (0.40)     | 0.60 (0.42)     | -3.87 (-11.61 to 3.88) p= 0.326     | -3.44 (-11.04 to 4.16) p= 0.373    |
| <b>Secondary nutritional outcomes</b>                      | n. of event (%) | n. of event (%) | OR (95% CI) p-value                 | OR (95% CI) p-value                |
| <b>Reaching caloric-intake goals <sup>b</sup></b>          | <b>high</b>     | <b>low</b>      |                                     |                                    |
|                                                            | 48/82 (59%)     | 82/141 (58%)    | 0.98 (0.57 to 1.71) p= 0.956        | 1.05 (0.59 to 1.87) p= 0.864       |
| <b>Reaching protein-intake goals <sup>b</sup></b>          | <b>high</b>     | <b>low</b>      |                                     |                                    |
|                                                            | 33/78 (42%)     | 72/140 (51%)    | 1.44 (0.83 to 2.52) p= 0.197        | 1.47 (0.83 to 2.62 p= 0.188        |

Cox regression models reporting adjusted hazard ratios according to levels stratified by empirical cutoff value of glutamine-to-glutamate ratio, which is 0.28. Low levels are defined as less or equal the cutoff value, high levels as greater the cutoff value. Abbreviations: OR, odds ratio; CI, confidence interval. \*Adjusted for CCI, CRP, NRS total score, sex and intervention.
